# Supplementary material
Source: HighWire-hosted journal article supplement (https://tsaco.smart01.highwire.org/content/9/1/e001241)
Supplement: inline-supplementary-material-1 [file inline-supplementary-material-1.pdf]

**Failure after Operative Repair is Higher for Ballistic Femoral Neck Fractures than for Closed, Blunt-Injury Fractures: A Multicenter Retrospective Cohort Study**

**Supplemental Documents**

**Table of Contents**

1. Supplemental Table 1. Page 2
2. Supplemental Table 2. Page 3-4

| <b>Supplemental Table 1</b>                                                                                                                                                                                                                                                                                                                                                                  |                                         |                                                    |                |
|----------------------------------------------------------------------------------------------------------------------------------------------------------------------------------------------------------------------------------------------------------------------------------------------------------------------------------------------------------------------------------------------|-----------------------------------------|----------------------------------------------------|----------------|
| <b>Patient Factors of those with a Minimum of 1-Year Follow-up or Who Have Met Failure Criteria</b>                                                                                                                                                                                                                                                                                          |                                         |                                                    |                |
|                                                                                                                                                                                                                                                                                                                                                                                              | <b>Ballistic Femoral Neck Fractures</b> | <b>Closed, Blunt Injury Femoral Neck Fractures</b> | <b>P-Value</b> |
|                                                                                                                                                                                                                                                                                                                                                                                              | N = 7                                   | N = 20                                             |                |
| BMI                                                                                                                                                                                                                                                                                                                                                                                          | 24.5 (20.4 – 30.7)                      | 23.8 (22.0 – 25.7)                                 | 0.658          |
| Age (Years)                                                                                                                                                                                                                                                                                                                                                                                  | 29 (26 – 41)                            | 37 (27 – 47)                                       | 0.272          |
| Gender (Female)                                                                                                                                                                                                                                                                                                                                                                              | 1 (14%)                                 | 6 (30%)                                            | 0.414          |
| Active tobacco use                                                                                                                                                                                                                                                                                                                                                                           | 5 (71%)                                 | 6 (30%)                                            | 0.055          |
| Diabetes                                                                                                                                                                                                                                                                                                                                                                                     | 0 (0%)                                  | 1 (5%)                                             | 0.547          |
| Length of hospital stay (Days)                                                                                                                                                                                                                                                                                                                                                               | 7 (7 – 12)                              | 5 (3 – 9)                                          | 0.181          |
| Follow-up (Months)                                                                                                                                                                                                                                                                                                                                                                           | 21 (13 – 32)                            | 21 (13 – 31)                                       | 0.890          |
| <p>BMI = Body mass index.</p> <p>*Failure criteria includes nonunion, avascular necrosis, conversion to total hip arthroplasty, or conversion to Girdlestone procedure.</p> <p>Values are represented as median (interquartile range) or as the number of patients (percentage of the group) where appropriate.</p> <p>P-values are from the Wilcoxon rank sum test or Chi-squared test.</p> |                                         |                                                    |                |

| <b>Supplemental Table 2</b>                                                                                                          |                                         |                                                    |                |
|--------------------------------------------------------------------------------------------------------------------------------------|-----------------------------------------|----------------------------------------------------|----------------|
| <b>Fracture Characteristics and Surgical Factors of Patients with a Minimum of 1-Year Follow-up or Who Have Met Failure Criteria</b> |                                         |                                                    |                |
|                                                                                                                                      | <b>Ballistic Femoral Neck Fractures</b> | <b>Closed, Blunt Injury Femoral Neck Fractures</b> | <b>P-Value</b> |
|                                                                                                                                      | N = 7                                   | N = 20                                             |                |
| Time from injury to surgery (Days)                                                                                                   | 1 (0 – 2)                               | 1 (0 – 1)                                          | 0.283          |
| Displaced fracture                                                                                                                   | 6 (86%)                                 | 20 (100%)                                          | 0.085          |
| AO Classification                                                                                                                    |                                         |                                                    |                |
| Subcapital <sup>1</sup> (31B1)                                                                                                       | 3 (43%)                                 | 6 (30%)                                            |                |
| Transcervical <sup>1</sup> (31B2)                                                                                                    | 4 (57%)                                 | 9 (45%)                                            |                |
| Basicervical <sup>1</sup> (31B3)                                                                                                     | 0 (0%)                                  | 4 (20%)                                            | 0.415          |
| Unreported                                                                                                                           | 0 (0%)                                  | 1 (5%)                                             |                |
| Implants                                                                                                                             |                                         |                                                    |                |
| Cannulated screw                                                                                                                     | 2 (29%)                                 | 7 (35%)                                            |                |
| Dynamic hip screw                                                                                                                    | 2 (29%)                                 | 10 (50%)                                           |                |
| Modern fixed angle construct*                                                                                                        | 1 (14%)                                 | 2 (10%)                                            |                |
| Blade plate                                                                                                                          | 2 (29%)                                 | 1 (5)                                              | 0.351          |
| Unreported                                                                                                                           | 0 (0%)                                  | 0 (0%)                                             |                |
| Surgical approach for reduction                                                                                                      |                                         |                                                    |                |
| Direct Anterior (Smith-Peterson)                                                                                                     | 6 (86%)                                 | 17 (85%)                                           |                |
| Anterolateral (Watson-Jones)                                                                                                         | 0 (0%)                                  | 3 (15%)                                            |                |
| Closed reduction                                                                                                                     | 1 (14%)                                 | 0 (0%)                                             | 0.142          |
| Fracture reduction quality <sup>†</sup>                                                                                              |                                         |                                                    |                |
| 1 - Excellent                                                                                                                        | 4 (57%)                                 | 14 (70%)                                           |                |
| 2 - Good                                                                                                                             | 2 (29%)                                 | 4 (20%)                                            |                |
| 3 - Fair                                                                                                                             | 0 (0%)                                  | 1 (5%)                                             |                |

|            |         |        |       |
|------------|---------|--------|-------|
| 4 - Poor   | 0 (0%)  | 0 (0%) | 0.729 |
| Unreported | 1 (14%) | 1 (5%) |       |

<sup>1</sup>= per the AO/OTA (2018) fracture compendium

\* Either the Femoral Neck System (DePuy Synthes, West Chester, PA) or Conquest FN (Smith & Nephew, Warford, England, UK).

† Fracture reduction was graded as excellent (<2mm of displacement and <5 degrees of angulation in any plane), good (2 to 5mm displaced and/or 5 to 10 degrees of angulation), fair (>5 to 10mm displaced and/or >10 to 20 degrees of angulation), and poor (>10mm displaced and/or >20 degrees of angulation) per Haidukewych et al. (2004).

Values are represented as median (interquartile range) or as the number of patients (percentage of the group).

P-values are from the Wilcoxon rank sum test or Chi-squared test.
